# Supplementary material
Source: PubMed Central journal article supplement (PMC3867651)
Supplement: 97320630009978S1.pdf [file 97320630009978S1.pdf]

## Supplementary material:

**Table 1:** Interaction of phytochemicals with HCV NS3 protease and helicase

| Protease                |          |            |                         | Helicase                |          |            |                      |
|-------------------------|----------|------------|-------------------------|-------------------------|----------|------------|----------------------|
| Phytochemicals          | S Score  | Rmsd Value | Interacting residues    | Phytochemicals          | S Score  | Rmsd value | Interacting residues |
| Quercetin 3-galactoside | -20.4386 | 2.5218     | His 57, Asp 81, Asp 168 | 3-glucoside             | -17.3470 | 2.0156     | Ala 157, His 528     |
| 3-glucoside             | -19.8765 | 1.6555     | Arg 155                 | Quercetin 3-galactoside | -13.5612 | 1.0159     | Val 524, Gln 526     |
| Epicatechin             | -18.5096 | 2.5606     | Asp 81, Ala 157         | Chlorogenic acid        | -11.2059 | 8.0074     | His 528              |
| Hydroxybenzoic acid     | -12.4426 | 1.2542     | Ser 139                 | Flavanol glycosides     | -10.9378 | 1.9460     | Asp 527              |
| Flavanol glycosides     | -11.0442 | 2.3385     | -                       | epicatechin             | -10.8113 | 1.8173     | Asp 79               |
| Chlorogenic acid        | -9.9895  | 6.8368     | -                       | Hydroxybenzoic acid     | -7.1618  | 1.6794     | -                    |
